# Supplementary material for: Enzymatic synthesis and phosphorolysis of 4(2)-thioxo- and 6(5)-azapyrimidine nucleosides by E. coli nucleoside phosphorylases
Source: publisher site journal article supplement (doi:10.3762/bjoc.12.254), 2016-12-01
Supplement: Additional file 1 [file 1860-5397-12-254-S1.pdf]

## Supporting Information

for

# Enzymatic synthesis and phosphorolysis of 4(2)-thio- and 6(5)-azapyrimidine nucleosides by *E. coli* nucleoside phosphorylases

Vladimir A. Stepchenko<sup>1</sup>, Anatoly I. Miroshnikov<sup>2</sup>, Frank Seela<sup>3</sup>, Igor A. Mikhailopulo<sup>1\*</sup>

Address: <sup>1</sup>Institute of Bioorganic Chemistry, National Academy of Sciences, Acad. Kuprevicha 5/2, 220141 Minsk, Belarus, <sup>2</sup>Shemyakin and Ovchinnikov Institute of Bioorganic Chemistry, Russian Academy of Sciences, Miklukho-Maklaya 16/10, 117997 GSP, Moscow B-437, Russia and <sup>3</sup>Laboratory of Bioorganic Chemistry and Chemical Biology, Center for Nanotechnology, Heisenbergstraße 11, D-48149 Münster, Germany

Email: Igor A. Mikhailopulo\* - imikhailopulo@gmail.com.

\*Corresponding author

## Analytical and computational data

### Table of contents

|                                                                                                                                                                            |     |
|----------------------------------------------------------------------------------------------------------------------------------------------------------------------------|-----|
| 1 – <b>Table S1.</b> <sup>1</sup> H NMR spectral data for synthesized 4(2)-thio- and 6-aza-pyrimidine nucleosides <b>1a–5a</b> .....                                       | S2  |
| 2 – <b>Table S2.</b> <sup>13</sup> C NMR spectral data for synthesized 4(2)-thio- and 6-aza-pyrimidine nucleosides <b>1a–5a</b> .....                                      | S3  |
| 3 – <b>Table S3.</b> The <i>ab initio</i> (6-31G** level; basis set; RHF; HyperChem 8.1) calculations of the electronic structure of 4(2)-thio- and 6-aza-pyrimidines..... | S4  |
| 4 – <b>Table S4.</b> Geometry optimization using (1) Molecular Mechanics Force Field Bio+ [CHARMM27] and (2) PM3 semi-empirical method.....                                | S6  |
| 5 – <b>Table S5.</b> HPLC data for compounds studied.....                                                                                                                  | S12 |
| 6 – UV and NMR data for 6-aza-2-thio-2'-deoxythymidine.....                                                                                                                | S13 |
| 7 – NMR data for 2-thio-2'-deoxyuridine.....                                                                                                                               | S16 |

**1 - Table S1:** <sup>1</sup>H NMR spectral data for synthesized 4(2)-thioxo- and 6-aza-pyrimidine nucleosides **1b–5b**.<sup>a)</sup>

| Compound                                             | <sup>1</sup> H Chemical Shifts, $\delta_{TMS}$ , ppm |               |               |               |            |            |            |                                                                | Coupling Constance, <i>J</i> , Hz |             |                                   |                      |                      |             | Remarks                            |           |
|------------------------------------------------------|------------------------------------------------------|---------------|---------------|---------------|------------|------------|------------|----------------------------------------------------------------|-----------------------------------|-------------|-----------------------------------|----------------------|----------------------|-------------|------------------------------------|-----------|
|                                                      | H1'                                                  | H2'           | H2''          | H3'           | H4'        | H5'        | H5''       | Others                                                         | 1',2'                             | 1',2''      | 2',3'                             | 2'',3'               | 3',4'                | 4',5'       |                                    | 4',5''    |
| <b>1b</b><br>( <sup>4</sup> S-U <sub>d</sub> )       | 6.02<br>t                                            | 2.18<br>dt    | 2.27<br>ddd   | 4.26<br>dt    | 3.88<br>dt | 3.65<br>dd | 3.57<br>dd | 7.54<br>(d, <i>J</i> <sub>5,6</sub> = 7.6; H6)<br>6.35 (d, H5) | <b>6.50</b>                       | <b>6.50</b> | <b>6.5</b><br><i>gemJ</i> = -14.1 | <b>4.30</b>          | 4.15                 | 3.50        | 5.10<br><i>gemJ</i> = -12.5        | cf. [1]   |
| <b>2b</b><br>( <sup>2</sup> S-U <sub>d</sub> )       | 6.81<br>t                                            | 2.16<br>ddd   | 2.49<br>ddd   | 4.31<br>dt    | 3.98<br>dt | 3.76<br>dd | 3.67<br>dt | 7.91<br>(d, <i>J</i> <sub>5,6</sub> = 8.1; H6)<br>6.04 (d, H5) | 6.4                               | 6.4         | 6.5<br><i>gemJ</i> = -14.2        | 4.3                  | 4.1                  | 3.4         | 6.5<br><i>gemJ</i> = -12.6         | cf. [2-4] |
| <b>3b</b><br>(6-Aza-U <sub>d</sub> )                 | 6.38<br>dd                                           | 2.21<br>ddd   | 2.57<br>ddd   | 4.48<br>dt    | 3.87<br>dt | 3.63<br>dd | 3.51<br>dd | 7.47 (s, H5)                                                   | <b>4.7</b>                        | <b>7.3</b>  | 6.8<br><i>gemJ</i> = -14.0        | 5.3                  | 6.3                  | 4.0         | 6.5                                | cf.[5,6]  |
| <b>4b</b><br>(6-Aza-T <sub>d</sub> )                 | 6.28<br>dd                                           | 2.11<br>br.dt | 2.50<br>br.dt | 4.37<br>br.dt | 3.79<br>m  | 3.57<br>dd | 3.46<br>dd | 2.03 (s, 3H; C <sup>5</sup> -CH <sub>3</sub> )                 | <b>5.0</b>                        | <b>7.0</b>  | 5.40<br><i>gemJ</i> = -13.5       | 5.40                 | 5.40                 | 4.0         | 6.50<br><i>gemJ</i> = -12.1        | Cf. [6]   |
| <b>5b</b><br>(6-aza- <sup>2</sup> S-T <sub>d</sub> ) | 7.09<br>dd                                           | 2.18<br>ddd   | 2.47<br>dt    | 4.41<br>dt    | 3.83<br>dt | 3.59<br>dd | 3.49<br>dd | 2.08 (s, 3H; C <sup>5</sup> -CH <sub>3</sub> )                 | <b>4.1</b>                        | <b>7.2</b>  | 6.7<br><i>gemJ</i> = -13.8        | 6.03<br>6.03<br>5.43 | 6.20<br>4.51<br>4.51 | <b>3.90</b> | <b>6.50</b><br><i>gemJ</i> = -12.2 |           |

<sup>a)</sup> The NMR spectra were measured on Bruker Avance-500-DRX (Bruker, Germany) using D<sub>2</sub>O as a solvent if it is not stated otherwise.

### References

- 1) Zhang, X.; Xu, Y.-Z. *Molecules* **2011**, *16*, 5655-5664.
- 2) Cleve, G.; Hoyer, Schulze, G., Vorbrüggen, H. *Chem. Ber.* **1973**, *106*, 3062-3072.
- 3) Bretner, M.; Kulikowski, T.; Dzik, J.M.; Balinska, M.; Rode, W.; Shugar, D. *J. Med. Chem.* **1993**, *36*, 3611-3617.
- 4) Poopeiko, N.E.; Poznanski, J.; Drabikowska, A.; Balzarini, J.; De Clercq, E.; Mikhailopulo, I.A.; Shugar, D.; Kulikowski, T. *Nucleosides & Nucleotides* **1995**, *14* (3-5), 435-437.
- 5) Seela, F.; Chitpepu, P. *J. Org. Chem.* **2007**, *72*, 4358-4366.
- 6) Kögler, M.; Busson, R.; De Jonghe, S.; Rozenski, J.; Van Belle, K.; Louat, T.; Munier-Lehmann, H.; Herdewijn, P. *Chemistry & Biodiversity* **2012**, *9*, 536-556.

**2 - Table S2:**  $^{13}\text{C}$  NMR spectral data for synthesized thioxo- and aza-pyrimidine nucleosides **1b–5b**<sup>a)</sup>

| Compound                                        | C2     | C4     | C5     | C5-Me | C6     | C1'                 | C2'   | C3'   | C4'                 | C5'   |
|-------------------------------------------------|--------|--------|--------|-------|--------|---------------------|-------|-------|---------------------|-------|
| <b>1b</b><br>( $^{4\text{S}}\text{U}_d$ )       | 149.05 | 190.55 | 113.92 | -     | 136.92 | 86.16               | 39.13 | 70.6  | 87.03               | 61.09 |
| <b>2b</b><br>( $^{2\text{S}}\text{U}_d$ )       | 175.65 | 163.50 | 106.78 | -     | 141.83 | 89.79 <sup>d)</sup> | 39.14 | 70.07 | 87.19 <sup>d)</sup> | 60.84 |
| <b>3b</b><br>(6-Aza- $\text{U}_d$ )             | 148.69 | 158.42 | 136.95 | -     | -      | 86.27 <sup>d)</sup> | 36.88 | 71.18 | 86.97 <sup>d)</sup> | 62.15 |
| <b>4b</b><br>(6-Aza- $\text{T}_d$ )             | 149.97 | 158.17 | 145.60 | 15.71 | -      | 85.65 <sup>d)</sup> | 36.70 | 71.09 | 86.66 <sup>d)</sup> | 62.00 |
| <b>5b</b><br>(6-aza- $^{2\text{S}}\text{T}_d$ ) | 174.20 | 153.77 | 150.72 | 15.77 | -      | 90.12               | 37.29 | 70.94 | 87.02               | 61.88 |

<sup>a)</sup> The NMR spectra were measured on Bruker Avance-500-DRX (Bruker, Germany) using  $\text{D}_2\text{O}$  as a solvent if it is not stated otherwise.

<sup>b)</sup> Data are in fair agreement with previously reported [1] In the transition from dU [1] to dU $^{4\text{S}}$  (i) the C2 & C5 resonances are moved to lower field by -26.85 and -10.84 ppm, respectively, and (ii) the C2 & C6 resonances are moved to higher field by +2.75 and +4.63 ppm, respectively.

<sup>c)</sup> Cf. [2].

<sup>d)</sup> Data for C1' and C4' resonances maybe interchangeable.

<sup>e)</sup> In the transition from 6-Aza-dT (cf. [4]) to 6-Aza-dT $^{2\text{S}}$  (i) the C2 & C5 resonances are moved to lower field by -24.23 and -5.12 ppm, respectively, and (ii) the C4 resonance is moved to higher field by +4.40 ppm.

## References

- Zhang, X.; Xu, Y.-Z. *Molecules* **2011**, *16*, 5655-5664.
- Carlucci, M.; Kierzek, E.; Olejnik, A.; Turner, D.H.; Kierzek, R. *Biochemistry* **2009**, *48*, 10882-10893.
- Seela, F.; Chittepu, P. *J. Org. Chem.* **2007**, *72*, 4358-4366.
- Kögler, M.; Busson, R.; De Jonghe, S.; Rozenski, J.; Van Belle, K.; Louat, T.; Munier-Lehmann, H.; Herdewijn, P. *Chemistry & Biodiversity* **2012**, *9*, 536-556.

**3 - Table S3:** The *ab initio* (6-31G\*\*; basis set; RHF) calculations of the electronic structure of 2(4)-thioxo- and 6-aza-pyrimidines.

| Compound               | N1                | N3                | C <sup>2</sup> =O |         | C <sup>2</sup> =S |                | C <sup>4</sup> =O               |                                         | C5                | N6 | C6             | Comments<br>[Dipole moment (D)]                                                  |
|------------------------|-------------------|-------------------|-------------------|---------|-------------------|----------------|---------------------------------|-----------------------------------------|-------------------|----|----------------|----------------------------------------------------------------------------------|
|                        | (H1)              | (H3)              |                   |         |                   |                | (C <sup>4</sup> =S)             | H5                                      |                   | H6 |                |                                                                                  |
| Uracil                 | -0.783<br>(0.343) | -0.830<br>(0.348) | 1.020             | -0.598  | -                 | -              | -0.584<br>0.182                 | -                                       | -0.342<br>0.192   | -  | 0.225<br>0.197 | $E_T = -258\ 836.3$ kcal/mol<br>(4.723 D)<br>$\Delta E_T = E_T - E_{T2} = -11.6$ |
| Ura-C <sup>4</sup> -OH | <b>-0.631</b>     | -0.822<br>(0.330) | 0.946             | -0.599  | -                 | -              | C +0.816<br>O -0.615<br>H +0364 | -                                       | -0.357<br>0.182   | -  | 0.213<br>0.173 | $E_T = -258\ 809.3$ kcal/mol<br>(5.758 D)                                        |
| C <sup>2</sup> =O      |                   |                   |                   |         |                   |                |                                 |                                         |                   |    |                |                                                                                  |
| Ura-C <sup>4</sup> =O  | <b>-0.675</b>     | -0.789<br>(0.349) | 0.962             | -0.612  | -                 | -              | -0.603<br>0.794                 | -                                       | -0.357<br>0.182   | -  | 0.213<br>0.173 | $E_{T2} = -258\ 824.7$ kcal/mol<br>(3.487 D)                                     |
| C <sup>2</sup> -OH     |                   |                   |                   | 0.382   |                   |                |                                 |                                         |                   |    |                |                                                                                  |
| Ura-C <sup>4</sup> =S  | -0.797<br>(0.348) | -0.749<br>(0.363) | 1.020             | -0.588  | -                 | -              | -                               | <b>-0.247</b>                           | -0.281<br>0.204   | -  | 0.203<br>0.236 | $E_T = -461\ 291.6$ kcal/mol<br>(5.672 D)<br>$\Delta E_T = E_T - E_{T2} = -10.0$ |
| C <sup>2</sup> =O      |                   |                   |                   |         |                   |                |                                 |                                         |                   |    |                |                                                                                  |
| Ura-C <sup>4</sup> SH  | <b>-0.641</b>     | -0.754<br>(0.338) | 0.944             | -0.593  | -                 | -              | -                               | C 0.228<br><b>S+0.150</b><br>(H +0.054) | -0.324<br>0.180   | -  | 0.214<br>0.173 | $E_T = -461\ 269.7$ kcal/mol<br>(5.758 D)                                        |
| C <sup>2</sup> =O      |                   |                   |                   |         |                   |                |                                 |                                         |                   |    |                |                                                                                  |
| Ura-C <sup>4</sup> =S  | <b>-0.656</b>     | -0.703<br>(0.365) | 0.963             | -0.606  | -                 | -              | -                               | <b>-0.287</b>                           | -0.261<br>0.191   | -  | 0.176<br>0.183 | $E_{T2} = -461\ 281.6$ kcal/mol<br>(5.171 D)                                     |
| C <sup>2</sup> -OH     |                   |                   |                   | (0.386) |                   |                |                                 |                                         |                   |    |                |                                                                                  |
| Ura-C <sup>4</sup> =O  | -0.705<br>(0.359) | -0.753<br>(0.365) | -                 | -       |                   |                | <b>-0.287</b>                   | -0.571                                  | -0.328<br>0.202   | -  | 0.217<br>0.205 | $E_T = -461\ 290.1$ kcal/mol<br>(5.322 D)<br>$\Delta E_T = E_T - E_{T2} = -12.9$ |
| C <sup>2</sup> =S      |                   |                   |                   |         | 0.489             |                | 0.807                           |                                         |                   |    |                |                                                                                  |
| Ura-C <sup>4</sup> -OH | <b>-0.556</b>     | -0.736<br>(0.346) | -                 | -       | 0.423             | <b>-0.306</b>  | C +0.816                        | -                                       | -0.336<br>(0.194) | -  | 0.213<br>0.184 | $E_T = -461\ 263.2$ kcal/mol<br>(7.561 D)                                        |
| C <sup>2</sup> =S      |                   |                   |                   |         |                   |                | O -0.609<br>H +0369             |                                         |                   |    |                |                                                                                  |
| Ura-C <sup>4</sup> =O  | <b>-0.601</b>     | -0.760<br>(0.346) | -                 | -       | 0.429             | <b>S 0.085</b> | -0.602                          | -                                       | -0.306<br>0.185   | -  | 0.149<br>0.176 | $E_{T2} = -461\ 277.2$ kcal/mol<br>(2.952 D)                                     |
| C <sup>2</sup> -SH     |                   |                   |                   |         |                   |                | H 0.107<br>0.791                |                                         |                   |    |                |                                                                                  |

|                         |               |         |       |               |   |   |               |   |               |               |   |                                               |
|-------------------------|---------------|---------|-------|---------------|---|---|---------------|---|---------------|---------------|---|-----------------------------------------------|
| <b>6-Aza-Ura</b>        | -0.549        | -0.826  |       | <b>-0.588</b> | - | - | <b>-0.557</b> |   | <b>-0.016</b> | <b>-0.184</b> | - | $E_T = -268\,849.3$ kcal/mol                  |
|                         | (0.356)       | (0.354) | 1.020 |               | - | - | 0.779         |   | +0.211        |               |   | (1.815 D)<br>$\Delta E_T = E_T - E_T = -18.6$ |
| <b>6-Aza-Ura</b>        | <b>-0.371</b> | -0.813  | 0.937 | -0.572        | - | - | -0.608        | - | -0.095        | -0.171        |   | $E_T = -268\,807.9$ kcal/mol                  |
| <b>C4-OH</b>            |               | (0.339) |       |               | - | - | 0.790         | - | 0.196         |               |   | (7.314 D) O <sup>4</sup> -H 0.367             |
| <b>6-Aza-Ura</b>        | <b>-0.465</b> | -0.790  |       | -0.608        | - | - | -0.572        | - | -0.012        |               |   | $E_T = -268\,830.7$ kcal/mol                  |
| <b>C<sup>2</sup>-OH</b> |               | (0.355) | 0.966 |               | - | - | 0.769         |   | +0.201        | -0.231        |   | (3.089 D) O <sup>2</sup> -H 0.387             |

|                                          |               |         |       |               |       |                |               |   |              |               |   |                                                       |
|------------------------------------------|---------------|---------|-------|---------------|-------|----------------|---------------|---|--------------|---------------|---|-------------------------------------------------------|
| <b>6-Aza-Thy</b>                         | <b>-0.548</b> | -0.828  |       | <b>-0.595</b> | -     | -              | <b>-0.561</b> | - | <b>0.125</b> | <b>-0.245</b> | - | $E_T = -293\,350.2$ kcal/mol                          |
|                                          | (0.352)       | (0.352) | 1.019 |               | -     | -              | 0.795         |   |              |               |   | (2.180 D)<br>$\Delta E_T = E_T - E_T = -29.3$         |
| 6-Aza-Thy                                | <b>-0.370</b> | -0.815  | 0.939 | <b>-0.578</b> | -     | -              | <b>-0.617</b> |   |              | <b>-0.203</b> | - | $E_T = -293\,306.7$ kcal/mol                          |
| <b>C4-OH</b>                             |               | (0.336) |       |               | -     | -              | 0.795         |   |              |               | - | (7.184 D) <sup>4</sup> O-H 0.366                      |
| 6-Aza-Thy                                | <b>-0.409</b> | -0.827  | 0.965 | <b>-0.591</b> |       |                | <b>-0.579</b> |   |              | <b>-0.288</b> | - | $E_T = -293\,320.9$ kcal/mol                          |
| <b>C<sup>2</sup>-OH</b>                  |               | (0.334) |       |               |       |                | 0.784         |   |              |               | - | (4.102 D) <sup>2</sup> O-H 0.359                      |
| <b>6-Aza-Thy-</b>                        | <b>-0.469</b> | -0.775  | -     | -             |       | <b>-0.277</b>  | <b>-0.549</b> | - | <b>0.140</b> | <b>-0.250</b> | - | $E_T = -495\,804.5$ kcal/mol                          |
| <b>C<sup>2</sup>=S</b>                   | (0.369)       | (0.368) | -     | -             | 0.487 |                | 0.793         | - |              |               | - | (3.486 D) 6-31G**<br>$\Delta E_T = E_T - E_T = -20.8$ |
|                                          | <b>-0.305</b> | -0.689  |       |               |       | <b>-0.258</b>  | <b>-0.615</b> | - |              | <b>-0.214</b> | - | $E_T = -495\,764.8$ kcal/mol                          |
| <b>C<sup>2</sup>=S; C<sup>4</sup>-OH</b> |               | (0.370) |       |               | 0.402 |                | 0.765         | - |              |               | - | (9.316 D) <sup>4</sup> O-H 0.387                      |
|                                          | <b>-0.379</b> | -0.761  |       |               |       | <b>S+0.173</b> | <b>-0.579</b> | - | 0.147        | <b>-0.299</b> | - | $E_T = -495\,783.7$ kcal/mol                          |
| <b>C<sup>2</sup>-SH; C<sup>4</sup>=O</b> |               | (0.342) |       |               | 0.409 |                | 0.791         | - |              |               | - | (3.206 D) <sup>2</sup> S-H 0.159                      |

**4 - Table S4:** Geometry optimization using (1) Molecular Mechanics Force Field Bio+ [CHARMM27] and (2) PM3 semi-empirical method.

| Substrate & Binding Mimic of Glu166 of the <i>E. coli</i> Uridine Phosphorylase ( <i>EcUP</i> ) catalytic site | Energy (kcal/mol)<br>Total Binding<br>Heat of Formation<br>Dipole moment (D) | The partial charges of selected atoms ( <i>e</i> ) |                        |        |       |                         |       |        |                           |        |       | Hydrogen Bonds (Å) and bond lengths of the atoms involved         |
|----------------------------------------------------------------------------------------------------------------|------------------------------------------------------------------------------|----------------------------------------------------|------------------------|--------|-------|-------------------------|-------|--------|---------------------------|--------|-------|-------------------------------------------------------------------|
|                                                                                                                |                                                                              | N <sup>1</sup><br>(H <sup>1</sup> )                | C <sup>4</sup> —O(S)—H |        |       | N <sup>3</sup> —H•••O=C |       |        | C <sup>2</sup> =O(S)•••HN |        |       |                                                                   |
| 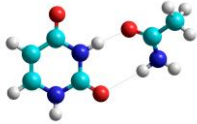                              | <b>-51,160.1</b><br>-2,134.6<br>-122.7<br>DM: <b>3.783 D</b> <sup>1)</sup>   | 0.083<br>(0.096)                                   | 0.294                  | -0.345 | -     | -0.046                  | 0.179 | -0.398 | 0.214                     | -0.426 | 0.085 | N <sup>3</sup> H•••O=C 2.817<br>C <sup>2</sup> =O•••HNH 2.484     |
|                               | <b>ΔE = +8.9</b><br>-51,151.2<br>-2,125.7<br>-113.8<br>DM: 4.120 D           | <b>-0.202</b>                                      | 0.142                  | -0.213 | 0.218 | 0.044                   | 0.176 | -0.420 | 0.263                     | -0.386 | 0.090 | N <sup>3</sup> H•••O=C 2.816<br>C <sup>2</sup> =O•••HNH 2.444     |
|                               | <b>ΔE = +16.1</b><br>-51,144.0<br>-2,118.5<br>-106.6<br>DM: <b>6.595 D</b>   | <b>-0.214</b>                                      | 0.302                  | -0.373 | -     | -0.022                  | 0.145 | -0.366 | 0.126                     | -0.223 | 0.214 | N <sup>3</sup> H•••O=C 2.829<br>C <sup>2</sup> -O-H•••N(H2) 2.873 |

<sup>1)</sup>The most populated tautomer is characterized by the lowest value of dipole moment (Debye).

|                                                                                         |                                                                          |                  |        |                        |       |       |       |        |       |               |       |                                                                                                                                                                                                        |
|-----------------------------------------------------------------------------------------|--------------------------------------------------------------------------|------------------|--------|------------------------|-------|-------|-------|--------|-------|---------------|-------|--------------------------------------------------------------------------------------------------------------------------------------------------------------------------------------------------------|
| 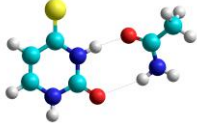       | $\Delta E = +6.5$<br>-48,654.5<br>-2,070.9<br>-52.1<br>DM: 5.560 D       | 0.114<br>(0.111) | -0.054 | -0.205                 | -     | 0.086 | 0.184 | -0.406 | 0.190 | <b>-0.406</b> | 0.082 | $N^3\text{-H}\cdots\text{O}=\text{C}$ 1.794<br>$C^2=\text{O}\cdots\text{HN}(\text{H})$ 2.500<br>$N^3\text{-H}\cdots\text{O}=\text{C}$ 2.833<br>$C^2=\text{O}\cdots\text{H-N}(\text{H})$ 3.475          |
| <br>1) | $\Delta E = -48,661.0$<br>-2,077.4<br>-58.6<br>DM: 3.285 D <sup>2)</sup> | <b>-0.166</b>    | -0.130 | <b>+0.144</b><br>(G-H) | 0.013 | 0.090 | 0.171 | -0.422 | 0.247 | -0.382        | 0.089 | $N^3\text{-H}\cdots\text{O}=\text{C}$ 1.805<br>$C^2=\text{O}\cdots\text{HNH}$ 2.436<br>$N^3\text{-H}\cdots\text{O}=\text{C}$ 2.817<br>$C^2=\text{O}\cdots\text{H-N}$ 3.358                             |
|        | $\Delta E = +20.6$<br>-48,640.4<br>-2,056.8<br>-38.0<br>DM: 7.583 D      | -0.167           | 0.064  | -0.270                 | -     | 0.129 | 0.151 | -0.366 | 0.092 | -0.215        | 0.222 | $N^3\text{-H}\cdots\text{O}=\text{C}$ 1.848<br>$C^2\text{-O-H}\cdots\text{N}(\text{H}_2)$ 1.923<br><br>$N^3\text{-H}\cdots\text{O}=\text{C}$ 2.833<br>$C^2\text{-O-H}\cdots\text{N}(\text{H}_2)$ 2.880 |

<sup>1)</sup> Only *EcUP* catalyzed the 2'-deoxyribosylation! (Time of reaction: 48 h; *EcUP* & *EcPNP* for 2-deoxy-D-ribofuranose generation; yield of dR: 39%.

<sup>2)</sup> The most populated tautomer is characterized by the lowest value of dipole moment (Debye).

|                                                                                   |                                                                                            |                  |       |        |       |       |       |        |        |                               |       |                                                                                                                                                         |
|-----------------------------------------------------------------------------------|--------------------------------------------------------------------------------------------|------------------|-------|--------|-------|-------|-------|--------|--------|-------------------------------|-------|---------------------------------------------------------------------------------------------------------------------------------------------------------|
|  | <b>-48,657.0</b><br>-2,073.3<br>-54.6<br>DM: 2.510 D                                       | 0.197<br>(0.114) | 0.272 | -0.314 | -     | 0.065 | 0.191 | -0.416 | -0.125 | <b>-0.351</b>                 | 0.111 | $N^3-H\cdots O=C$ 2.807<br>$C^2=S\cdots H-N(H)$ 3.401<br>$C^2=S$ 1.665<br>$C^2=S\cdots H-N(H)$ <b>2.435</b><br>$N^3-H$ 1.025<br>$N^3-H\cdots O=C$ 1.790 |
|  | <b><math>\Delta E \approx +9.0</math></b><br>-48,648.0<br>-2,064.3<br>-45.6<br>DM: 5.731 D | <b>-0.128</b>    | 0.105 | -0.199 | 0.222 | 0.176 | 0.188 | -0.437 | -0.069 | <b>-0.294</b>                 | 0.118 | $N^3-H\cdots O=C$ 2.798<br>$C^2=S\cdots H-N(H)$ 3.363<br>$C^2=S$ 1.650<br>$C^2=S\cdots H-N(H)$ <b>2.385</b><br>$N^3-H$ 1.027<br>$N^3-H\cdots O=C$ 1.781 |
|  | <b>-48,657.7</b><br>-2,074.1<br>-55.3<br>DM: 5.735 D                                       | <b>-0.146</b>    | 0.279 | -0.369 | -     | 0.036 | 0.155 | -0.411 | -0.126 | <b>+0.139</b><br>(H<br>0.003) | -     | $N^3-H\cdots O=C$ 2.835<br>$C^2S-H\cdots N(H_2)$ 2.697<br>$C^2-S$ 1.783<br>$C^2-S-H$ 1.333<br>$N^3-H$ 1.013<br>$N^3-H\cdots O=C$ 1.823                  |

2'-Deoxy-2-thiouracil (**2b**;  $^{25}U_d$ ) is formed in the transglycosylation reaction (Thd as a donor of 2-deoxy-D-ribofuranose; 0.4 mM phosphate buffer (pH 7.0), r.t., 24 h) in the presence of *E. coli* UP and TP in yields of 3 and 25%.



|                                                                                   |                                                                            |                                |       |        |       |        |       |        |       |               |       |                                                                                                                                                                                                                                                          |
|-----------------------------------------------------------------------------------|----------------------------------------------------------------------------|--------------------------------|-------|--------|-------|--------|-------|--------|-------|---------------|-------|----------------------------------------------------------------------------------------------------------------------------------------------------------------------------------------------------------------------------------------------------------|
| 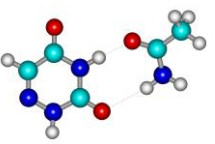 | <b>-51,792.7</b><br>- 1,999.0<br>- 97.1<br>DM: 3.430 D                     | <b>0.050</b><br>(H:<br>-0.117) | 0.260 | -0.313 | -     | -0.055 | 0.185 | -0.408 | 0.204 | <b>-0.398</b> | 0.084 | N <sup>3</sup> -H...O=C 2.811<br>C <sup>2</sup> =O...H-N(H) 3.420<br>C <sup>2</sup> =O 1.226<br>C <sup>2</sup> =O...H-N(H) 2.485<br>N <sup>3</sup> -H 1.020;<br>N <sup>3</sup> -H...O=C 1.796<br>N <sup>6</sup> <b>-0.054 e</b>                          |
|  | <b>ΔE = +9.6</b><br><b>-51,783.1</b><br>- 1,989.4<br>- 87.4<br>DM: 5.617 D | <b>-0.136</b>                  | 0.120 | -0.205 | 0.222 | 0.043  | 0.181 | -0.424 | 0.215 | <b>-0.353</b> | 0.088 | N <sup>3</sup> -H...O=C 2.804<br>C <sup>2</sup> =O...H-N(H) 3.399<br>C <sup>2</sup> =O 1.217<br>C <sup>2</sup> =O...H-N(H) 2.458<br>N <sup>3</sup> -H 1.02<br>N <sup>3</sup> -H...O=C 1.792<br>N <sup>6</sup> <b>+0.132 e</b>                            |
|  | <b>ΔE = +13.8</b><br>-51,778.9<br>- 1,985.3<br>- 83.3<br>DM: 8.638 D       | -0.196                         | 0.266 | -0.341 | -     | -0.025 | 0.153 | -0.353 | 0.097 | -0.218        | 0.221 | N <sup>3</sup> -H...O=C 2.793<br>C <sup>2</sup> -O-H...N(H <sub>2</sub> ) 3.576<br>C <sup>2</sup> -O 1.346<br>C <sup>2</sup> -O-H N(H <sub>2</sub> ) 2.663<br>N <sup>3</sup> -H 1.013<br>N <sup>3</sup> -H...O=C 1.829<br>N <sup>6</sup> <b>+0.076 e</b> |

| Substrate & Binding Mimic of Glu166 of the <i>E. coli</i> Uridine Phosphorylase catalytic site | Energy (kcal/mol)<br>Total Binding<br>Heat of Formation<br>Dipole moment (D) | The partial charges of selected atoms ( <i>e</i> ) |                        |               |       |                         |       |        |                           |               |             | Hydrogen Bonds (Å) and bond lengths of the atoms involved                                                                                                                                                                                                |
|------------------------------------------------------------------------------------------------|------------------------------------------------------------------------------|----------------------------------------------------|------------------------|---------------|-------|-------------------------|-------|--------|---------------------------|---------------|-------------|----------------------------------------------------------------------------------------------------------------------------------------------------------------------------------------------------------------------------------------------------------|
|                                                                                                |                                                                              | N <sup>1</sup><br>(H <sup>1</sup> )                | C <sup>4</sup> —O(S)—H |               |       | N <sup>3</sup> —H•••O=C |       |        | C <sup>2</sup> =O(S)•••HN |               |             |                                                                                                                                                                                                                                                          |
| 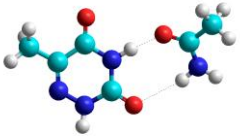              | <b>-55,244.3</b><br>-2,282.6<br>-105.5<br><br>DM = 2.994 D                   | 0.057<br>(H 0.115)                                 | 0.267                  | -0.317        | -     | -0.054                  | 0.184 | -0.407 | 0.202                     | <b>-0.399</b> | 0.084       | N <sup>3</sup> -H•••O=C 2.811<br>C <sup>2</sup> =O•••H-N(H) 3.437<br>C <sup>2</sup> =O 1.225<br>C <sup>2</sup> =O H-N(H) 2.501<br>N <sup>3</sup> -H 1.021<br>N <sup>3</sup> -H•••O=C 1.804<br>N <sup>6</sup> <b>-0.071 e</b>                             |
|               | <b>ΔE = +8.7</b><br>-55,235.6<br>-2,273.9<br>-96.9<br>DM = 5.374 D           | <b>-0.132</b>                                      | 0.115                  | -0.211        | 0.227 | 0.046                   | 0.181 | -0.421 | 0.214                     | <b>-0.355</b> | 0.086       | N <sup>3</sup> -H•••O=C 2.805<br>C <sup>2</sup> =O•••H-N(H) 3.425<br>C <sup>2</sup> =O 1.217<br>C <sup>2</sup> =O H-N(H) 2.494<br>N <sup>3</sup> -H 1.020<br>N <sup>3</sup> -H•••O=C 1.790<br>N <sup>6</sup> <b>+0.137 e</b>                             |
|               | <b>ΔE = +15.9</b><br>-55,228.4<br>-2,266.7<br>-89.7<br>DM = 8.338 D          | <b>-0.183</b>                                      | 0.272                  | <b>-0.344</b> | -     | -0.023                  | 0.154 | -0.352 | 0.088                     | <b>0.220</b>  | N6<br>0.220 | N <sup>3</sup> -H•••O=C 2.841<br>C <sup>2</sup> -O-H•••N(H <sub>2</sub> ) 2.820<br>C <sup>2</sup> -O 1.341<br>C <sup>2</sup> -O-H N(H <sub>2</sub> ) 1.862<br>N <sup>3</sup> -H 1.015<br>N <sup>3</sup> -H•••O=C 1.839<br>N <sup>6</sup> <b>+0.064 e</b> |

|                                                                                   |                                                                            |                    |       |               |       |       |       |        |        |               |              |                                                                                                                                                                                    |
|-----------------------------------------------------------------------------------|----------------------------------------------------------------------------|--------------------|-------|---------------|-------|-------|-------|--------|--------|---------------|--------------|------------------------------------------------------------------------------------------------------------------------------------------------------------------------------------|
| 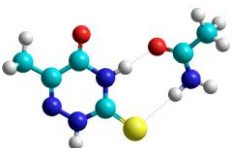 | $\Delta E = +1.1$<br><b>-52,739.7</b><br>-2,219.9<br>-36.0<br>DM = 0.523 D | 0.174<br>(H 0.137) | 0.245 | -0.292        | -     | 0.042 | 0.197 | -0.421 | -0.137 | <b>-0.313</b> | 0.112        | $N^3-H \cdots O=C$ 2.800<br>$C^2=S \cdots H-N(H)$ 3.424<br>$C^2-S$ 1.778<br>$C^2-S \cdots H-N(H)$ 1.709<br>$N^3-H$ 1.014<br>$N^3-H \cdots O=C$ 1.816<br>$N^6$ <b>-0.084 e</b>      |
|  | $\Delta E = +9.7$<br>-52,731.1<br>-2,211.2<br>-27.4<br>DM = 6.413 D        | <b>-0.064</b>      | 0.065 | -0.197        | 0.329 | 0.188 | 0.189 | -0.439 | -0.136 | <b>-0.227</b> | 0.115        | $N^3-H \cdots O=C$ 2.797<br>$C^2=S \cdots H-N(H)$ 3.397<br>$C^2-S$ 1.620<br>$C^2-S \cdots H-N(H)$ 2.403<br>$N^3-H$ 1.026<br>$N^3-H \cdots O=C$ 1.776<br>$N^6$ <b>+0.110 e</b>      |
|  | <b>-52,740.8</b><br>-2,220.9<br>-37.1<br>DM = <b>7.554</b> D               | <b>-0.110</b>      | 0.251 | <b>-0.343</b> | -     | 0.037 | 0.162 | -0.418 | -0.173 | <b>0.165</b>  | <b>0.002</b> | $N^3-H \cdots O=C$ 2.835<br>$C^2-S-H \cdots N(H_2)$ 3.998<br>$C^2-S$ 1.7775<br>$C^2-S-H \cdots N(H_2)$ 1.332<br>$N^3-H$ 1.013<br>$N^3-H \cdots O=C$ 1.822<br>$N^6$ <b>+0.032 e</b> |

Only *EcTP* likely recognizes the  $C^2-S-H \cdots NH_2$ - tautomer as a substrate owing to (i) the correct positioning in the catalytic site by the interaction of methyl group with the relevant residues of amino acids, and (ii) higher nucleophilicity of the  $N1$  atom!

**5 - Table S5:** HPLC data for compounds studied.

System A: Nucleosil 100-5 C<sub>18</sub> 150 × 4.6, 5 μm; 5% acetonitrile in 0.1% TFA-H<sub>2</sub>O, v/v; 1 mL/min; detection at 260 nm.

System B: Nucleodur C<sub>18</sub> Gravity 150 × 4.6, 5 μm; 5% acetonitrile in 0.1% TFA-H<sub>2</sub>O, v/v; 1 mL/min; detection at 260 nm.

System C: Nucleodur C<sub>18</sub> Gravity 150 × 4.6, 5 μm; 10% acetonitrile in 0.1% TFA-H<sub>2</sub>O, v/v; 1 mL/min; detection at 260 nm.

| Compound                              | Retention time, min |          |          |
|---------------------------------------|---------------------|----------|----------|
|                                       | System A            | System B | System C |
| 4-Thiouracil* ( <b>1a</b> )           | 4.3                 | –        | 2.9      |
| 4-Thio-2'-deoxyuridine* ( <b>1b</b> ) | 7.7                 | –        | 3.9      |
| 2-Thiouracil ( <b>2a</b> )            | 3.3                 | –        | 2.0      |
| 2-Thio-2'-deoxyuridine ( <b>2b</b> )  | –                   | –        | 3.1      |
| 6-Azauracil ( <b>3a</b> )             | 4.3                 | 2.1      | –        |
| 6-Aza-2'-deoxyuridine ( <b>3b</b> )   | 7.7                 | 2.9      | –        |
| 6-Azathymine ( <b>4a</b> )            | 3.7                 | 3.6      | –        |
| 6-Azathymidine ( <b>4b</b> )          | 4.1                 | 7.3      | –        |
| 2-Thio-6-azathymine ( <b>5a</b> )     | 5.1                 | –        | 3.3      |
| 2-Thio-6-azathymidine ( <b>5b</b> )   | 13.4                | –        | 4.3      |
| 2-Thiothymine                         | –                   | –        | 3.5      |
| 2-Thiothymidine ( <b>11b</b> )        | –                   | –        | 9.6      |
| 4-Thiothymine*                        | –                   | –        | 6.9      |
| 4-Thiothymidine* ( <b>11a</b> )       | –                   | –        | 8.9      |
| Thymine                               | 3.8                 | 3.0      | –        |
| Thymidine                             | 5.9                 | 4.7      | –        |
| Uracil                                | –                   | 2.0      | –        |
| 2'-Deoxyuridine                       | –                   | 2.6      | –        |
| Guanine                               | 3.4                 | –        | –        |
| 2'-Deoxyguanosine                     | 3.4                 | –        | –        |
| 5-Azacytosine                         | 1.6                 | –        | –        |
| 5-Aza-2'-deoxycytidine                | 5.3                 | –        | –        |

\*Detection at 300 nm.

**6** – UV and NMR data for 6-aza-2-thio-2'-deoxythymidine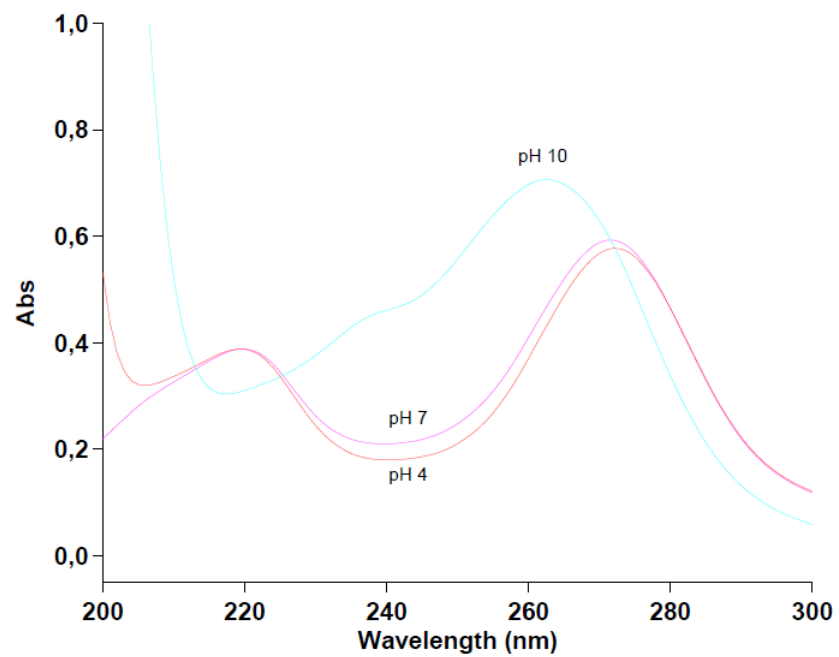

The UV spectra of 2-thio-6-azathymidine at diverse pH values.

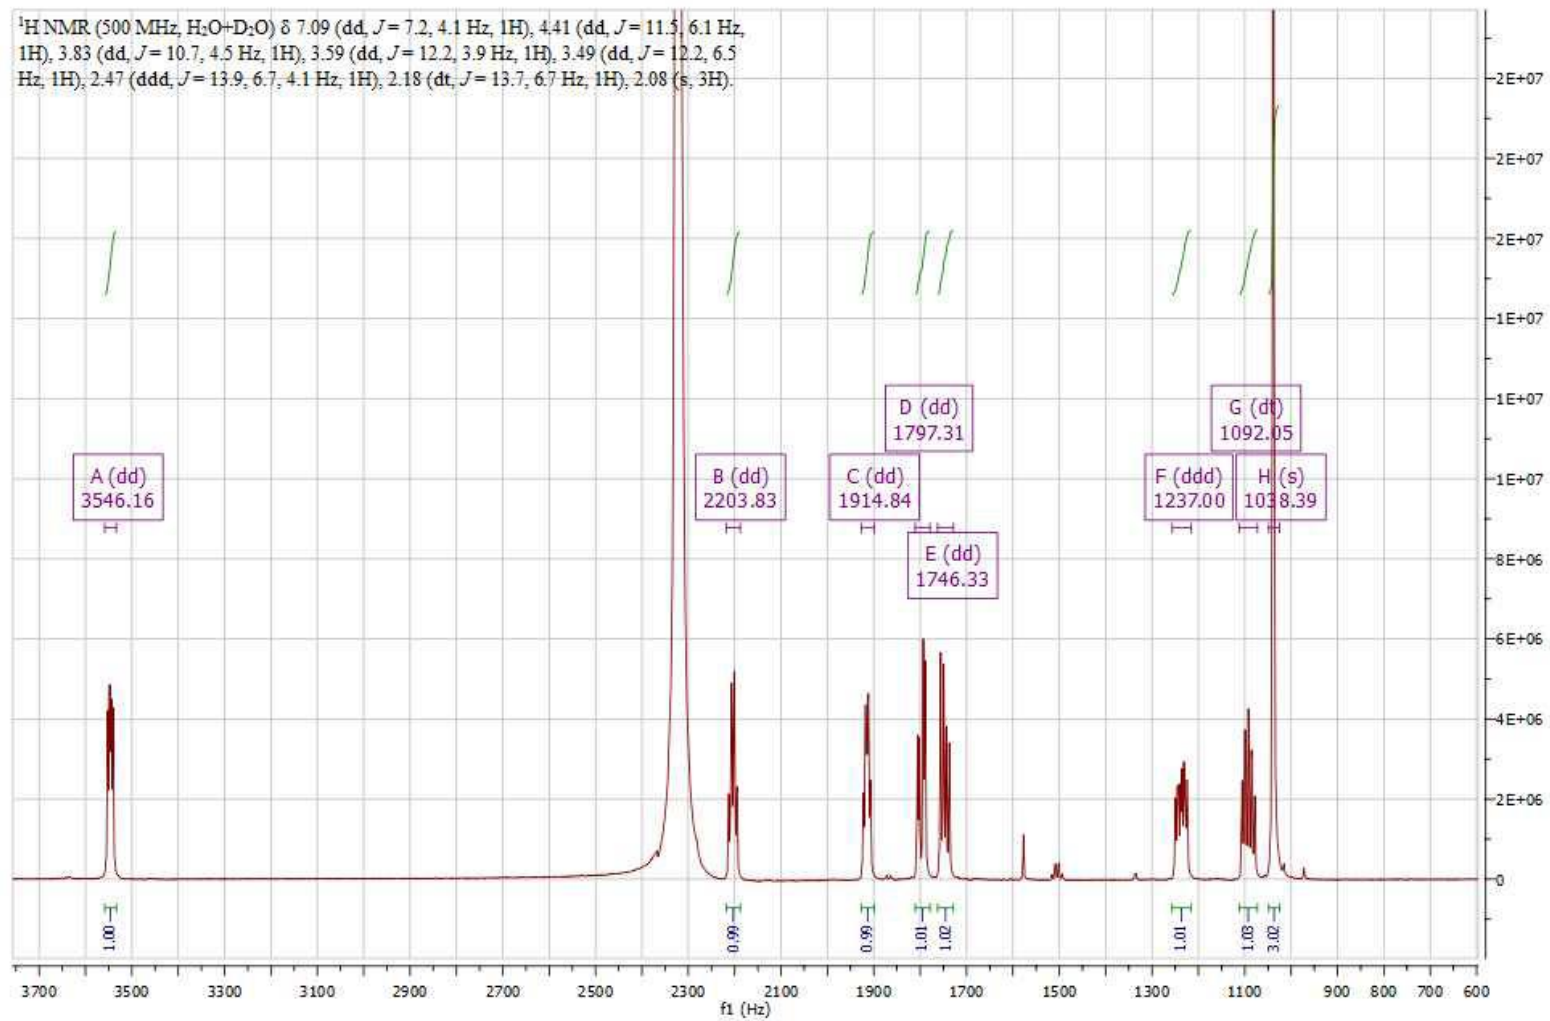 $^1\text{H}$  NMR spectrum (scale in Hz)

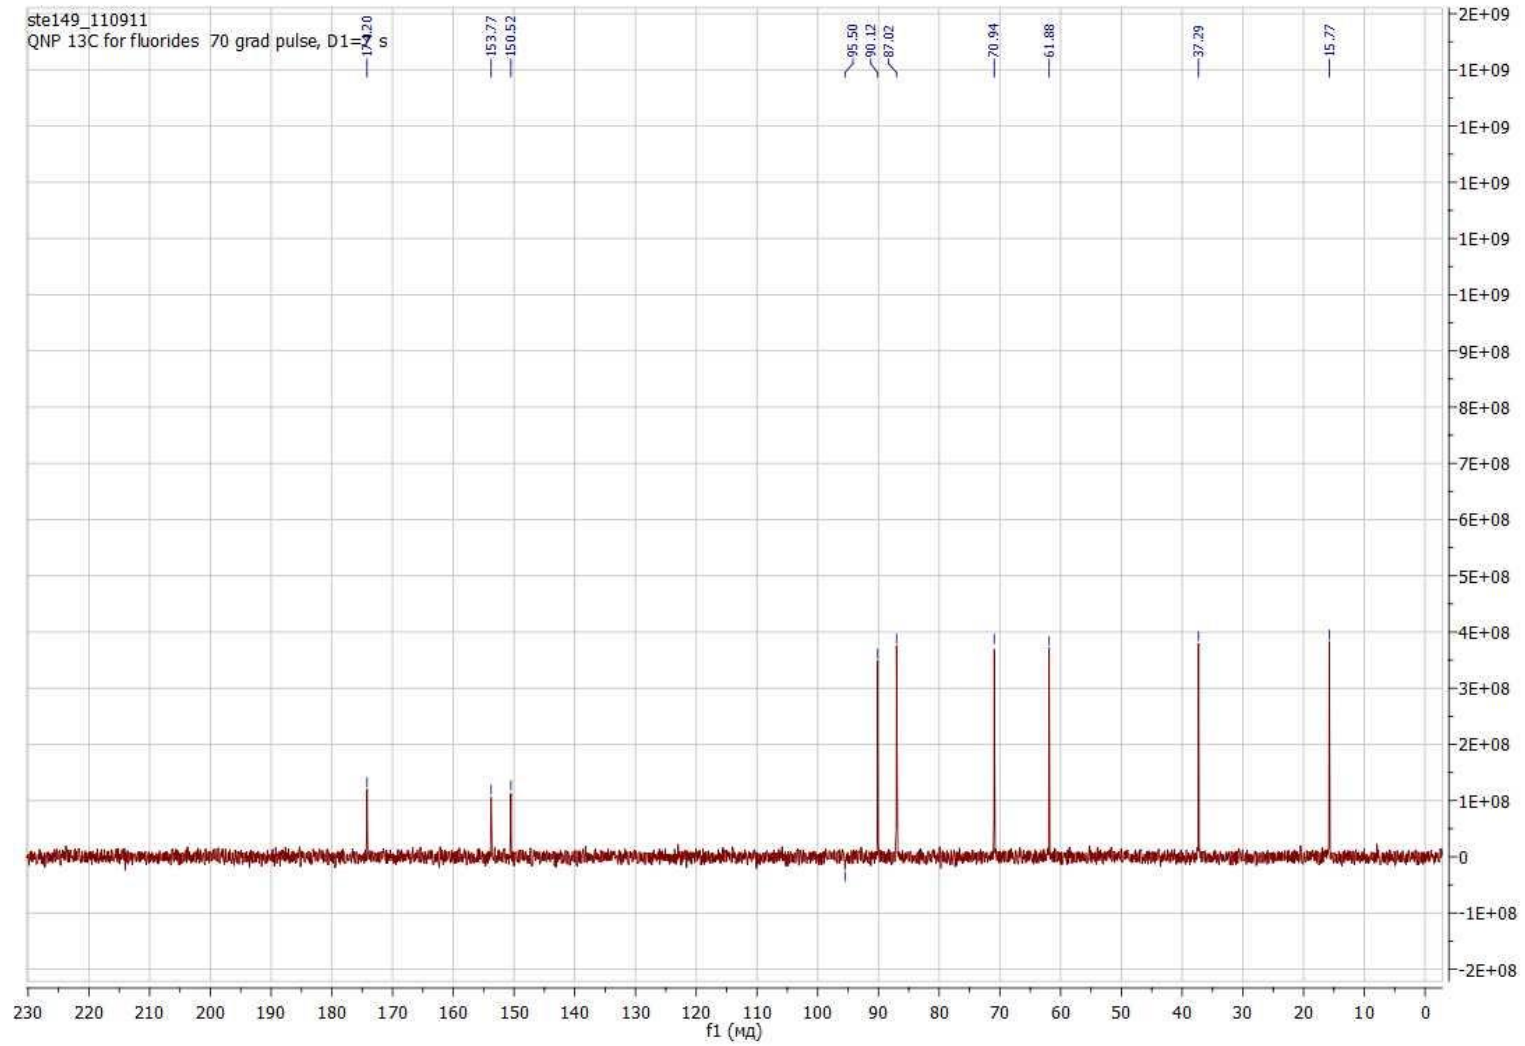 $^{13}\text{C}$  NMR Spectrum

## 7 -NMR Data for 2-thio-2'-deoxyuridine

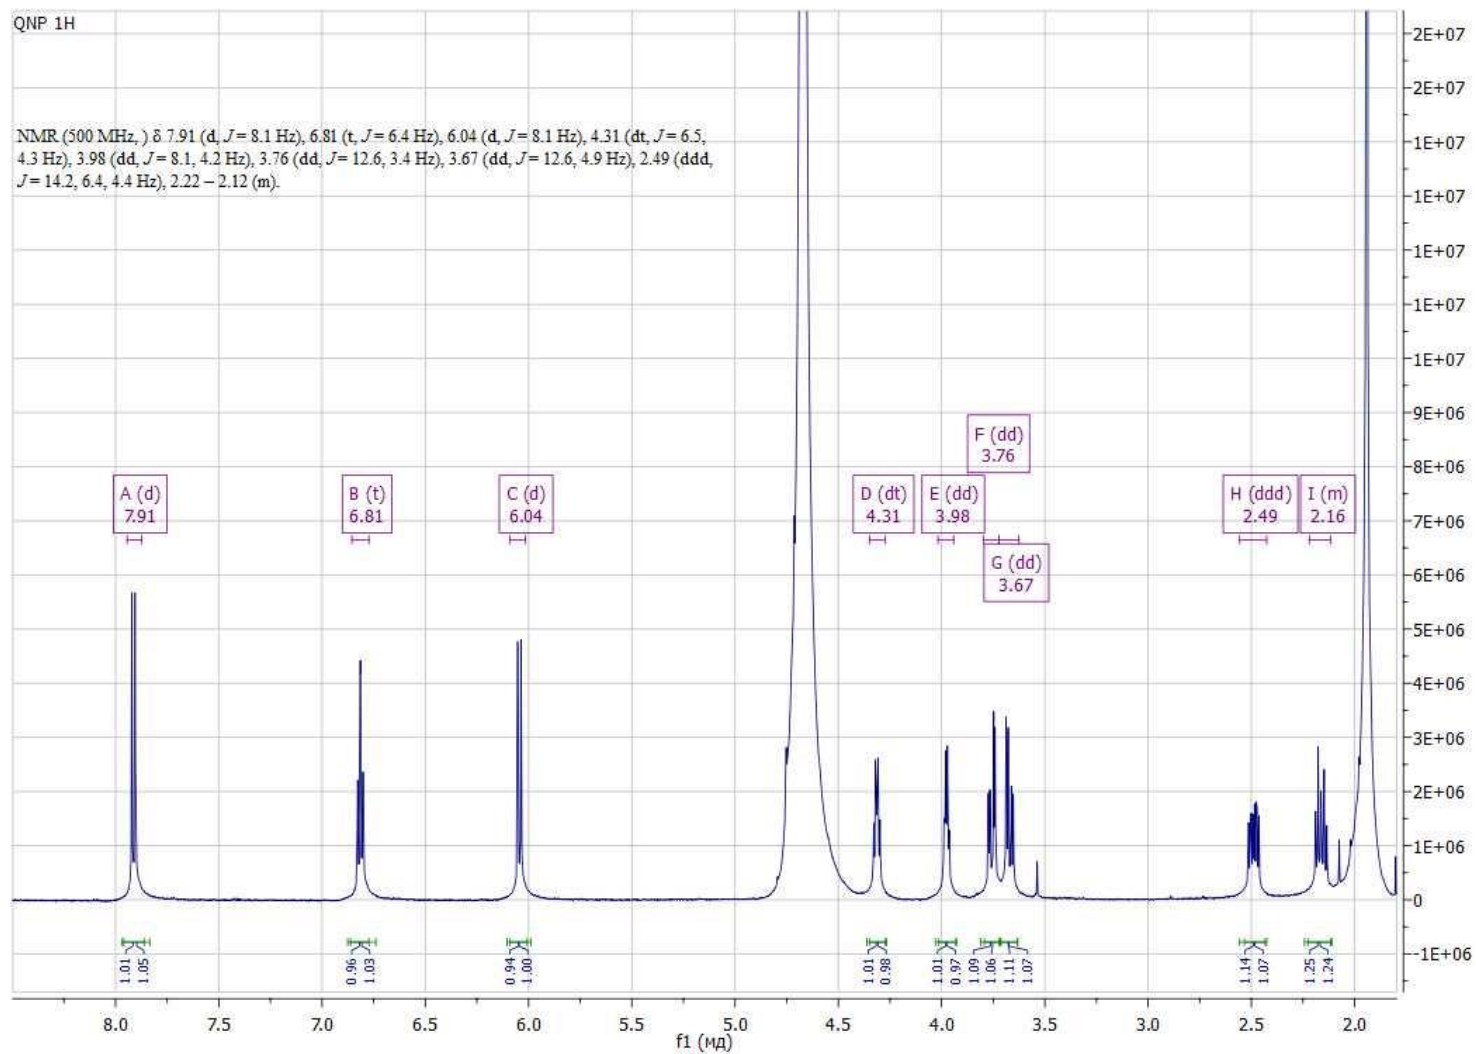

<sup>1</sup>H NMR Spectrum (resonance signal of methel group of MeCN at 1.95 ppm)



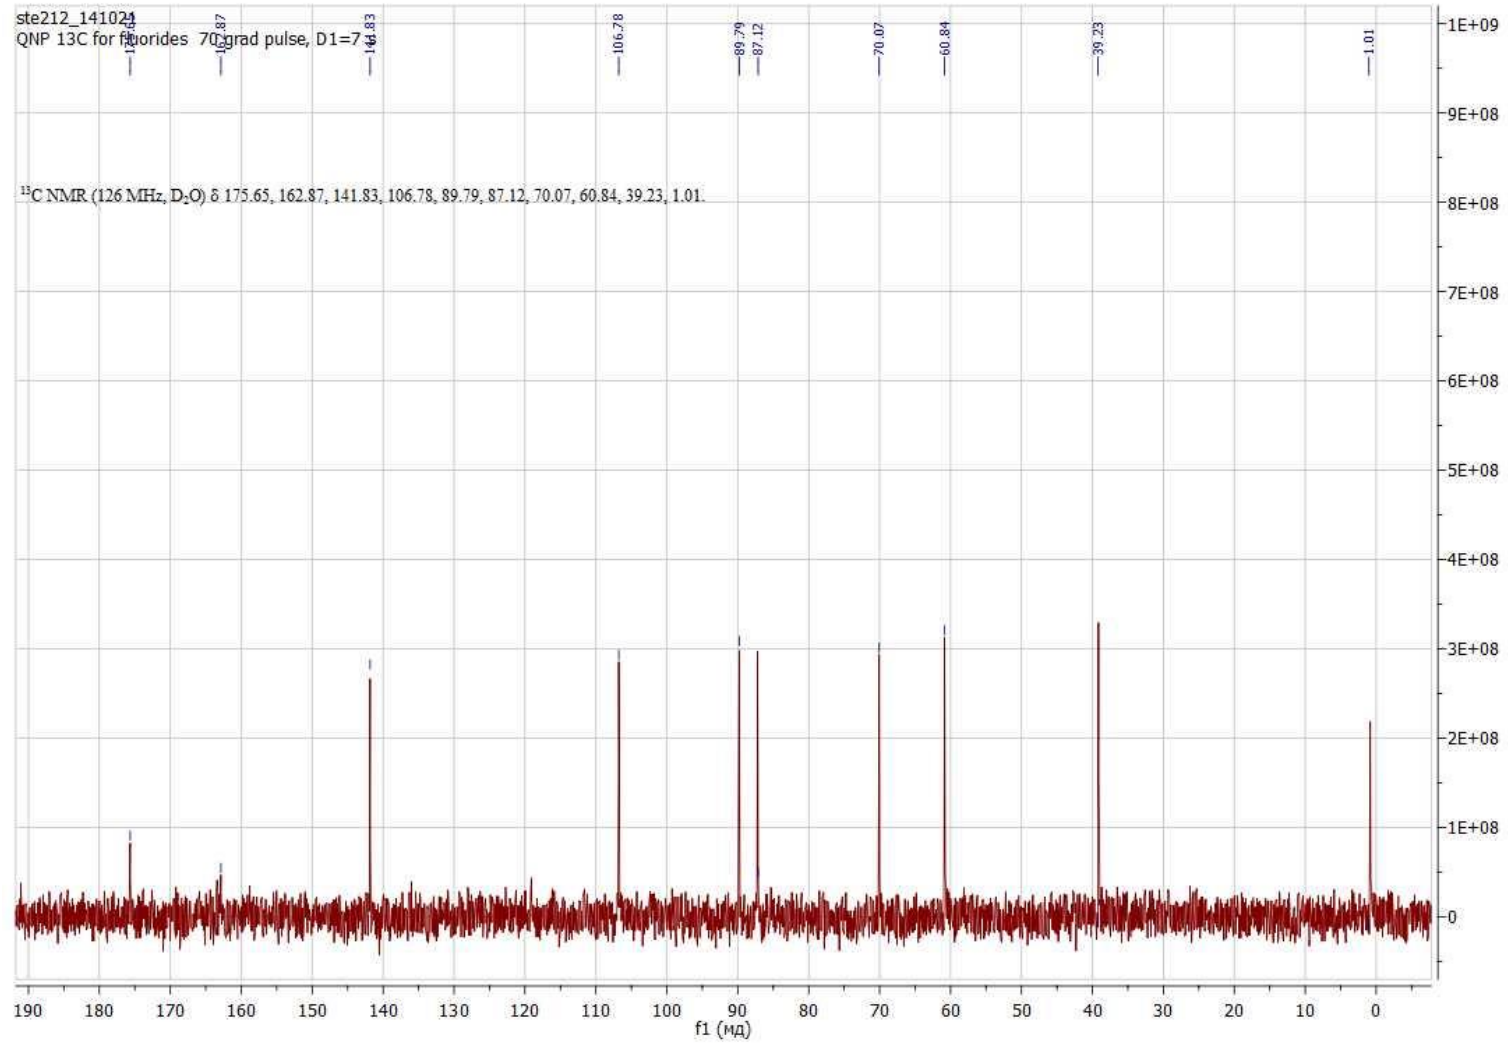 $^{13}\text{C}$  NMR Spectrum
